# Supplementary material for: Measurement report: Development of a portable peroxy radical measurement system and application for diagnosing local ozone formation and transport
Source: Copernicus journal article supplement (doi:10.5194/egusphere-2026-316), 2026-02-10
Supplement: Supplementary file [file egusphere-2026-316-AC1-supplement.pdf]

## Response to comments

Reviewer 1:

*General comments: The authors report a self-constructed PERCA-CEAS system for  $RO_2^*$  measurement and its application during a field campaign in Zhuhai for more than 15 days.  $P(O_3)$  was calculated and the local photochemical production of  $O_3$  was evaluated based on measurements. The instrument represents a valuable tool for investigating atmospheric chemistry. However, the manuscript still requires some revisions to better clarify the innovations of the instrument, methodology, and scientific findings.*

Response: We appreciate the reviewer for the careful reading and their constructive comments on our manuscript. Below, we provide a point-by-point response to each of the reviewer's concerns. **As detailed below, the reviewer's comments are in italicized font, our response to the comments are shown as normal font. New or modified texts are in blue.**

*Comment [1-1]: To better demonstrate the advantages of the instrument presented in this study, a summary table comparing different  $RO_2^*$  measurement techniques is recommended, particularly the PERCA-based methods developed in previous studies. The table should include key parameters such as chemical chain length, detection limit, and instrument weight, as well as their respective advantages and disadvantages.*

Response [1-1]: Thanks for the suggestion. A summary table has been compiled to compare our PERCA-CEAS system against previously reported PERCA-based methods, covering key metrics such as calibration sources, chain length, detection limits, operating pressure and measurement uncertainties.

We have added this comprehensive comparison table and supplemented the related information in Section 3.1.

“The optimal CL for the PERCA-CEAS measurement system was determined to be  $30 \pm 2$  under the conditions of  $RH = 10\%$ ,  $NO = 8$  ppm, and  $CO = 8\%$  based on the pure  $HO_2$  calibration. Calibration using a mixed radical source consisting of 50%  $HO_2$  and 50%  $CH_3O_2$  yielded a CL of  $24 \pm 1$  under the same conditions. As summarized in Table 1, the obtained CL is lower than values reported in most previous PERCA studies, which were typically above 50 and occasionally exceeded 200 (e.g., George et al., 2020; Wood and Charest, 2014). The differences in CL are primarily attributed to wall loss of  $HO_2$  radicals due to reactor material, reactor design and working pressure. Although the obtained CL is relatively low compared with these PERCA instruments, the results demonstrate that the developed PERCA-CEAS system provides stable and reliable sensitivity for atmospheric  $RO_2^*$  measurements.

Table 1. Summary of performance for reported PERCA measurement systems

| Measurement System | Channel Configuration | Calibration Source                                                       | CL             | LOD                   | Uncertainty | Pressure (mbar) | Reference                |
|--------------------|-----------------------|--------------------------------------------------------------------------|----------------|-----------------------|-------------|-----------------|--------------------------|
| PERCA-luminol      | Single                | CH <sub>3</sub> O <sub>2</sub>                                           | 200-260        | 2 pptv                | 40%         | 400 ~ 1000      | (Green et al., 2003)     |
| PERCA-luminol      | Dual                  | HO <sub>2</sub><br>50%HO <sub>2</sub> +50%CH <sub>3</sub> O <sub>2</sub> | 45±7           | 3±2 pptv<br>(3σ)      | /           | 200             | (Kartal et al., 2010)    |
| PERCA-luminol      | Dual                  | HO <sub>2</sub><br>50%HO <sub>2</sub> +50%CH <sub>3</sub> O <sub>2</sub> | 88±17<br>64±18 | 3 pptv<br>(1σ)        | /           | 300             | (Horstjann et al., 2014) |
| PERCA-CRDS         | Dual                  | HO <sub>2</sub>                                                          | 150±50         | 10 pptv<br>(3σ)       | /           | 1000            | (Liu et al., 2009)       |
| PERCA-CRDS         | Dual                  | HO <sub>2</sub><br>CH <sub>3</sub> O <sub>2</sub>                        | 200<br>180     | 4 pptv<br>(3σ)        | /           | 1000            | (Liu and Zhang, 2014)    |
| PERCA-CRDS         | Dual                  | HO <sub>2</sub><br>50%HO <sub>2</sub> +50%CH <sub>3</sub> O <sub>2</sub> | 62 ± 9         | < 2 pptv              | 15%         | 200 ~ 350       | (George et al., 2020)    |
| PERCA-CRDS         | Dual                  | HO <sub>2</sub><br>RO <sub>2</sub> *                                     | 55             | 0.9 pptv<br>(3σ)      | /           | 1000            | (Duncan et al., 2020)    |
| PERCA-CAPS         | Dual                  | CH <sub>3</sub> C(O)O <sub>2</sub><br>CH <sub>3</sub> O <sub>2</sub>     | 168±20         | 0.6 pptv<br>(1σ, 60s) | 25%         | 1000            | (Wood and Charest, 2014) |
| ECHAMP-CAPS        | Dual                  | CH <sub>3</sub> C(O)O <sub>2</sub><br>CH <sub>3</sub> O <sub>2</sub>     | 17             | 2.5 pptv<br>(1σ, 90s) | 27%         | 1000            | (Wood et al., 2017)      |
| PERCA-IBBCEAS      | Dual                  | HO <sub>2</sub>                                                          | 91±11          | 0.9 pptv<br>(1σ)      | 16-20%      | 1000            | (Chen et al., 2016)      |
| PERCA-CEAS         | Single                | HO <sub>2</sub><br>50%HO <sub>2</sub> +50%CH <sub>3</sub> O <sub>2</sub> | 30±2<br>24±1   | 0.38 pptv<br>(1σ)     | 18.4-25.7%  | 1000            | This work                |

”

Comment [1-2]: *The instrument was only applied for continuous measurement of about 15 days. How would it perform for longer-term measurements?*

Response [1-2]: To further evaluate long-term performance, the instrument was subsequently deployed in a two-month field campaign. For illustration, the attached figure R1 shows the time series of our measurements during the two-month campaign. Over the two-month deployment, the instrument showed stable performance, with no noticeable loss in CEAS mirror reflectivity or need for major optical realignment and recalibration. Routine maintenance was limited to replacing filters and silica gel every 3–4 days. These results demonstrate that the instrument is suitable for long-term continuous measurements.

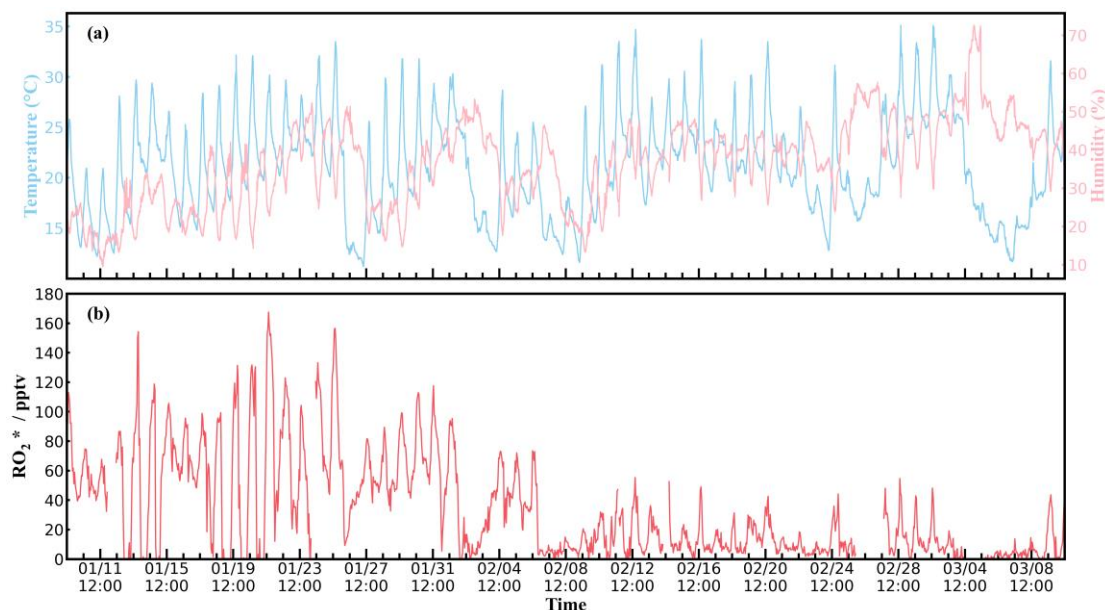

Figure R1. Time series of (a) temperature and relative humidity, and (b) RO<sub>2</sub>\* radical concentration during the two-month field campaign.

Comment [1-3]: *Local production and transport contributions to O<sub>3</sub> were estimated based on the measurements in this study. The results suggest that O<sub>3</sub> enhancement was primarily driven by local production, while regional transport mainly played an export role. However, source-oriented chemical transport model simulations have shown that O<sub>3</sub> is less affected by local emissions than by regional transport (Gong et al., 2021), which appears to be inconsistent with the conclusions of this study. Moreover, process analysis has also indicated that vertical mixing can contribute more to surface O<sub>3</sub> than chemical production (Mathur et al., 2018). Please provide possible explanations for the discrepancies between the results of this study and those reported by three-dimensional chemical transport models, and evaluate the reliability and limitations of the conclusions drawn in this work.*

Response [1-3]: Thanks for your suggestion. Gong et al., (2021) focused on the Yangtze River Delta during the spring–summer transition, whereas our observations were conducted in November in the Pearl River Delta under prevailing northeasterly monsoon conditions. During the campaign, the Zhuhai site was located downwind of the highly urbanized inner PRD region. Transport of air masses from the inner PRD was accompanied by continuous photochemical O<sub>3</sub> production, leading to elevated O<sub>3</sub> levels at the coastal site. Located at the southern edge of the PRD under prevailing northeasterly flow, Zhuhai effectively represented a regional outflow site, where O<sub>3</sub>-rich air masses were further transported toward the South China Sea.

In addition, the transport term in our budget analysis, R(O<sub>3</sub>) is defined as a residual term in the budget closure framework, which inherently aggregates all unresolved physical processes, including horizontal advection, vertical mixing, and dry deposition. Therefore, the influence of vertical entrainment discussed in CTM studies, such as Mathur et al., (2018), is inherently included within our diagnosed transport contribution. While Mathur et al. mainly emphasized the role of vertical mixing in the early morning

buildup of  $O_3$ , our analysis focuses on the processes contributing to the formation of surface  $O_3$ . During the observation, there was no significant enhancement of  $O_3$  concentration after the break down of nocturnal boundary layer in the early morning, distinct from the case when vertical mixing from residual layer occurs.

We also acknowledge the limitations associated with the calculation of  $P(O_3)_{net}$ , which are mainly related to uncertainties in  $RO_2^*$  measurements, the approximation of  $k_{eff}$ , and the upper limit of  $D(O_3)$ . Based on uncertainty propagation, the overall uncertainty in  $P(O_3)_{net}$  was estimated to be approximately 21.5-28.0%. This uncertainty analysis has been added and clarified in the revised manuscript.

“Considering uncertainties associated with  $RO_2^*$  measurements (18.4-25.7%), the approximation of  $k_{eff}$  (~10%), and the upper limit of  $D(O_3)$  level (5%), the overall uncertainty in  $P(O_3)_{net}$  was estimated to be approximately 21.5-28.0%.”

Comment [1-4]:  *$P(O_3)$  was approximated as  $P(O_3)_{net}$  in this study, because  $D(O_3)$  was estimated to be ~0.7 ppb, and  $P(O_3)_{net}$  always has positive contribution. However, chemical process has negative contribution to  $O_3$  during nighttime due to NO titration. Therefore, the estimation of local and regional transport contribution to  $O_3$  has large uncertainties using this method.*

Response [1-4]: Thanks for pointing out this issue. Our calculation of  $P(O_3)$  based on  $k_{eff}[RO_2^*][NO]$  specifically represents the photochemical production rate. Therefore, nighttime NO titration should not have been included in our calculation by using  $RO_2^*$  measurements. To correct for this issue, we have excluded all nighttime data (18:00–06:00) for  $P(O_3)$  calculation in the revised manuscript. Accordingly, we have updated the calculations and the corresponding results in Figure 3, Figure 5 and Figure 6.

“

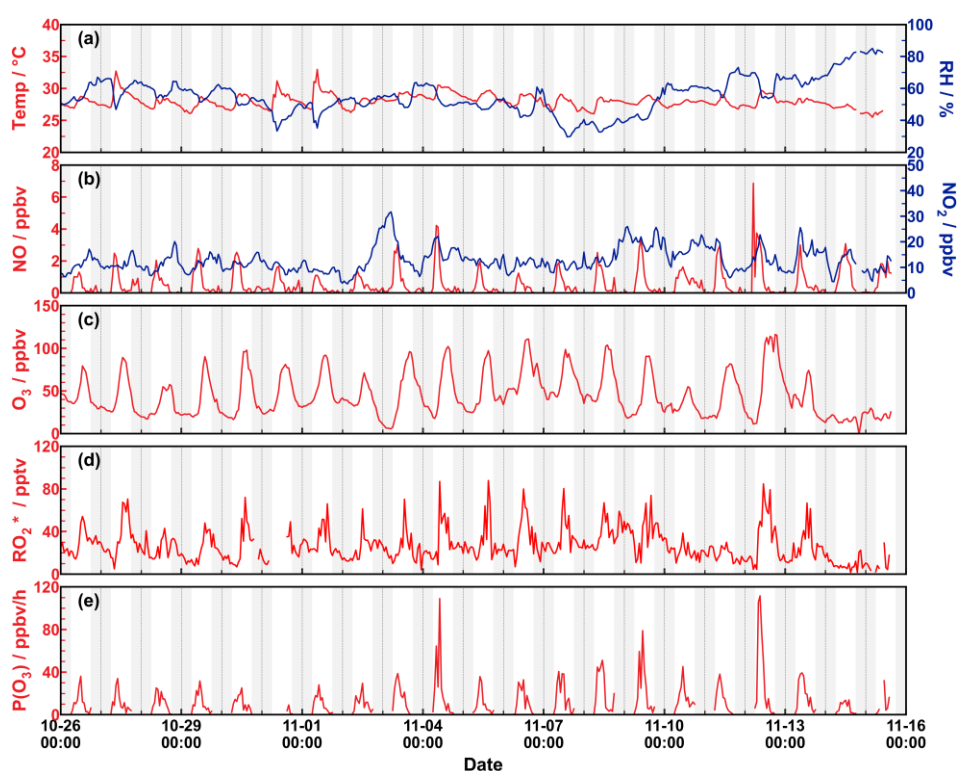

Figure 3. Time series of meteorological parameters (T, RH), major pollutants ( $O_3$ ,  $NO_x$ ,  $RO_2^*$ ), and daytime  $P(O_3)$  (06:00–18:00) during the autumn observation period of 2024, with a temporal resolution of 1 hour.

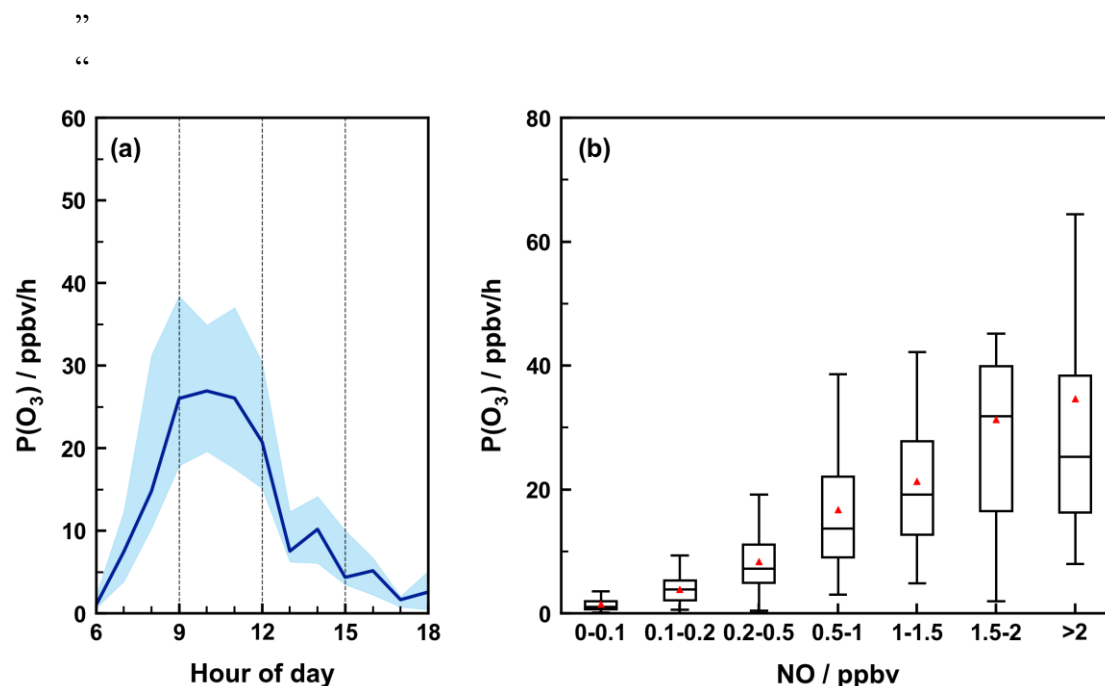

Figure 5. Diurnal variation and  $NO$ -dependent distribution of daytime  $P(O_3)$ . (a) Average diurnal profile of daytime  $P(O_3)$  during the observation period. The dark line denotes the median, and the light blue shading indicates the interquartile range (25th–75th percentile). (b) Box plots of daytime  $P(O_3)$  under different  $NO$  concentration ranges. The black line inside each box represents the median, and the red triangle marks the mean value within each interval.

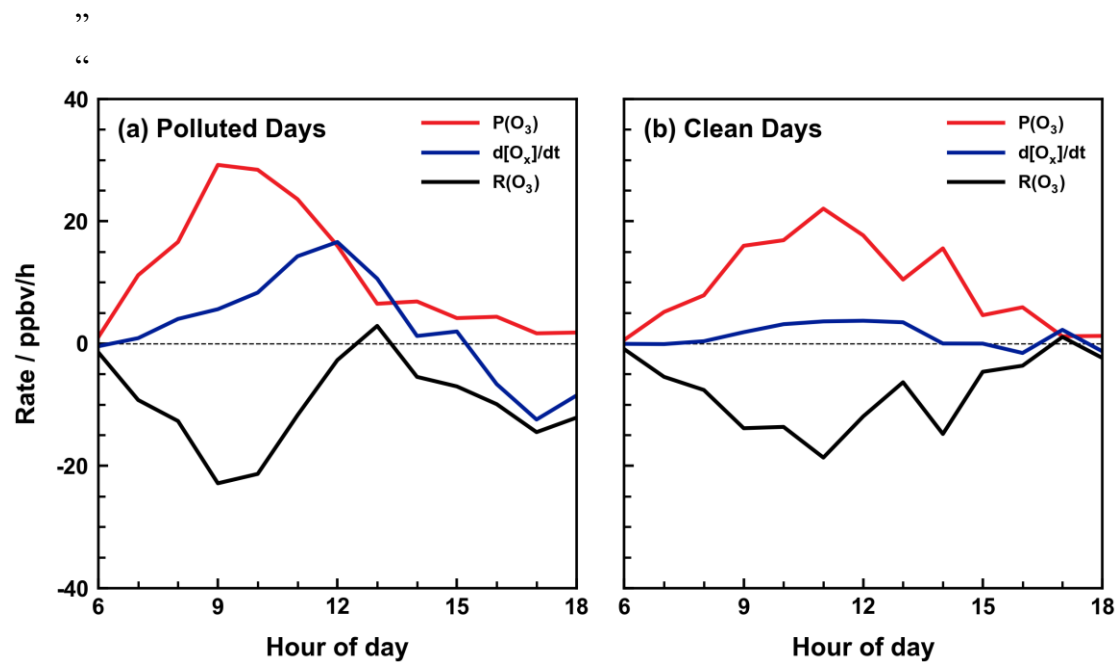

Figure 6. Diurnal variations of daytime  $P(O_3)$ ,  $d[Ox]/dt$ , and  $R(O_3)$  during (a) polluted and (b) clean periods. The red line represents the photochemical ozone production rate  $P(O_3)$ , the blue line indicates the rate of change of total oxidants  $d[Ox]/dt$ , and the black line corresponds to the regional

transport rate  $R(\text{O}_3)$ .

”

Comment [1-5]: *Line 119: “analyzing” should be corrected as “analyze”.*

Response [1-5]: We have corrected “analyzing” to “**analyze**”.

Comment [1-6]: *Line 217: “time” should be corrected as “times”.*

Response [1-6]: We have corrected “time” to “**times**”.

Comment [1-7]: *Line 299: “show” should be corrected as “showed”.*

Response [1-7]: We have corrected “show” to “**showed**”.

## REFERENCE

- Chen, Y., Yang, C., Zhao, W., Fang, B., Xu, X., Gai, Y., Lin, X., Chen, W., and Zhang, W.: Ultra-sensitive measurement of peroxy radicals by chemical amplification broadband cavity-enhanced spectroscopy, *Analyst*, 141, 5870–5878, <https://doi.org/10.1039/C6AN01038E>, 2016.
- Duncanu, M., Lahib, A., Tomas, A., Stevens, P. S., and Dusanter, S.: Characterization of a chemical amplifier for peroxy radical measurements in the atmosphere, *Atmos. Environ.*, 222, 117106, <https://doi.org/10.1016/j.atmosenv.2019.117106>, 2020.
- George, M., Andrés Hernández, M. D., Nenakhov, V., Liu, Y., and Burrows, J. P.: Airborne measurement of peroxy radicals using chemical amplification coupled with cavity ring-down spectroscopy: the PeRCEAS instrument, *Atmos. Meas. Tech.*, 13, 2577–2600, <https://doi.org/10.5194/amt-13-2577-2020>, 2020.
- Gong, K., Li, L., Li, J., Qin, M., Wang, X., Ying, Q., Liao, H., Guo, S., Hu, M., Zhang, Y., and Hu, J.: Quantifying the impacts of inter-city transport on air quality in the Yangtze River delta urban agglomeration, china: implications for regional cooperative controls of PM<sub>2.5</sub> and O<sub>3</sub>, *Sci. Total Environ.*, 779, 146619, <https://doi.org/10.1016/j.scitotenv.2021.146619>, 2021.
- Green, T. J., Reeves, C. E., Brough, N., Edwards, G. D., Monks, P. S., and Penkett, S. A.: Airborne measurements of peroxy radicals using the PERCA technique, *J. Environ. Monit.*, 5, 75–83, <https://doi.org/10.1039/b204493e>, 2003.
- Horstjann, M., Andrés Hernández, M. D., Nenakhov, V., Chrobry, A., and Burrows, J. P.: Peroxy radical detection for airborne atmospheric measurements using absorption spectroscopy of NO<sub>2</sub>, *Atmos. Meas. Tech.*, 7, 1245–1257, <https://doi.org/10.5194/amt-7-1245-2014>, 2014.
- Kartal, D., Andrés-Hernández, M. D., Reichert, L., Schlager, H., and Burrows, J. P.: Technical note: characterisation of a DUALER instrument for the airborne measurement of peroxy radicals during AMMA 2006, *Atmos. Chem. Phys.*, 10, 3047–3062, <https://doi.org/10.5194/acp-10-3047-2010>, 2010.

- Liu, Y. and Zhang, J.: Atmospheric peroxy radical measurements using dual-channel chemical amplification cavity ringdown spectroscopy, *Anal. Chem.*, 86, 5391–5398, <https://doi.org/10.1021/ac5004689>, 2014.
- Liu, Y., Morales-Cueto, R., Hargrove, J., Medina, D., and Zhang, J.: Measurements of peroxy radicals using chemical amplification-cavity ringdown spectroscopy, *Environ. Sci. Technol.*, 43, 7791–7796, <https://doi.org/10.1021/es901146t>, 2009.
- Mathur, R., Hogrefe, C., Hakami, A., Zhao, S., Szykman, J., and Hagler, G.: A call for an aloft air quality monitoring network: need, feasibility, and potential value, *Environ. Sci. Technol.*, 52, 10903–10908, <https://doi.org/10.1021/acs.est.8b02496>, 2018.
- Wood, E. C. and Charest, J. R.: Chemical amplification - cavity attenuated phase shift spectroscopy measurements of atmospheric peroxy radicals, *Anal. Chem.*, 86, 10266–10273, <https://doi.org/10.1021/ac502451m>, 2014.
- Wood, E. C., Deming, B. L., and Kundu, S.: Ethane-based chemical amplification measurement technique for atmospheric peroxy radicals, *Environ. Sci. Technol. Lett.*, 4, 15–19, <https://doi.org/10.1021/acs.estlett.6b00438>, 2017.
