# Supplementary material for: Measurement report: Development of a portable peroxy radical measurement system and application for diagnosing local ozone formation and transport
Source: Copernicus journal article supplement (doi:10.5194/egusphere-2026-316), 2026-02-10
Supplement: Supplementary file [file egusphere-2026-316-AC2-supplement.pdf]

## Response to comments

Referee #2:

*General comments: This manuscript presents the development of a compact PERCA–CEAS system for in situ measurements of total peroxy radicals ( $RO_2^*$ ), together with its application during a field campaign in Zhuhai. The topic is highly relevant for the atmospheric chemistry community, as direct measurements of peroxy radicals are essential for understanding ozone formation processes. The reported detection limit ( $\sim 0.2$  pptv) and successful field deployment demonstrate promising instrument performance.*

*Overall, the manuscript contains valuable results; however, I believe that major revisions are required before publication. My main concerns relate to the description and validation of the measurement technique, particularly the chain length (CL) calibration, as well as some conceptual simplifications and inconsistencies in the instrument description. I also suggest improvements in clarity and language throughout the manuscript.*

Response: Thank you for the valuable comments. We have fully considered your concerns, improved the chain length calibration experiment and clarified the instrument description throughout the manuscript. The detailed results are presented in our response letter. **As detailed below, the reviewer's comments are in italicized font, our response to the comments are shown as normal font. New or modified texts are in blue.**

Comment [2-1]: **Definition and terminology of  $RO_2^*$ .** Lines 15 and 42: *It may be more precise to define  $RO_2^*$  as  $HO_2 + \Sigma RO_2$ , rather than  $HO_2 + RO_2$ . It would also be helpful to ensure consistent treatment of  $RO_2^*$  as a sum of radical species throughout the manuscript.*

Response [2-1]: Thank you for the suggestion. We have redefined  $RO_2^*$  as “ **$HO_2 + \Sigma RO_2$** ” in lines 15 and 42, and ensured consistent terminology throughout the manuscript.

Comment [2-2]: **Chain length (CL) calibration and radical interferences.** *The CL calibration described in Section 2.2 may introduce a systematic overestimation of CL. Photolysis of  $H_2O$  produces both OH and H radicals, which may introduce OH into the reactor. If OH reaches the inlet, it can participate in amplification (starting with R4) but is not accounted for in the  $S_2$  signal.*

*A possible validation approach would be to add sufficient CO in the  $HO_2$  source to convert OH into  $HO_2$ . Extra caution should be taken while adding CO to the source to avoid CL interference coming from the added CO triggering chain reaction in the background mode. It should also be acknowledged that PERCA systems amplify OH and RO radicals, which may become relevant during calibration conditions.*

Response [2-2]: Thank you for pointing out this issue. To address the potential

systematic overestimation of CL caused by OH radicals, we redesigned the calibration setup. In this optimized configuration, CO (or N<sub>2</sub> for background mode), originally introduced at the front of the Nafion reactor, is premixed with synthetic air and then introduced immediately downstream of the H<sub>2</sub>O photolysis zone, allowing rapid mixing with the photolysis products. This facilitates the prompt conversion of both OH and H radicals into HO<sub>2</sub>, while minimizing potential wall losses of radicals before they enter the reactor. During the calibration, the total sampling flow rate and the concentrations of NO and CO within the Nafion reactor remained strictly consistent with our previous experimental conditions.

The revised calibration procedure and signal recording logic are as follows: When the mercury lamp is turned on, CO is introduced upstream in the amplification mode, ensuring that OH is quantitatively converted into HO<sub>2</sub>. The total HO<sub>2</sub> concentration is twice that derived from H+O<sub>2</sub> pathway alone. The corresponding NO<sub>2</sub> signal is recorded as S<sub>1</sub>, which represents the amplified NO<sub>2</sub> produced through the chain reaction initiated by this total HO<sub>2</sub>. In the background mode with the lamp still on, N<sub>2</sub> is substituted for CO upstream. In the absence of CO within the reactor, the chain reaction is not triggered and only the HO<sub>2</sub> derived from H+O<sub>2</sub> pathway reacts with NO. The corresponding signal in this mode is recorded as S<sub>2</sub>. Subsequently, when the mercury lamp is turned off, the NO<sub>2</sub> signals are recorded as S<sub>3</sub> and S<sub>4</sub> under the same amplification and background gas flow conditions, respectively. Consequently, the Chain Length is determined by the formula  $CL = (S_1 - S_3) / [2 (S_2 - S_4)]$ .

Using this revised procedure, we found that the overestimation of CL associated with OH-derived HO<sub>2</sub> is 47%, and the effective chain length is determined to be  $30 \pm 2$  under our calibration conditions. Accordingly, we have updated the procedures described in Section 2.2 and revised the optimal CL results shown in Section 3.1.

#### Section 2.2:

“In this work, CL was determined using on-site peroxy radical calibration sources based on water vapor photolysis. A pen-type Hg lamp was used to photolyze H<sub>2</sub>O in an N<sub>2</sub> carrier gas (mixture of dry and humidified N<sub>2</sub>), producing H atoms and OH radicals (R5). Immediately downstream of the lamp, a mixture of synthetic air and reagent gases (CO/N<sub>2</sub> or CH<sub>4</sub>/N<sub>2</sub>) was introduced to allow rapid mixing with the photolysis products and reduce radical wall losses. In this configuration, H atoms react with O<sub>2</sub> in the synthetic air to form HO<sub>2</sub> (R6), while the reagent gases control the radical composition. When CO is used as the reagent gas, OH radicals are quantitatively converted to HO<sub>2</sub> (R4), providing a HO<sub>2</sub> calibration source without interference from OH and RO<sub>2</sub> radical.”

“The CL was determined using four distinct NO<sub>2</sub> signals detected by the CEAS. For the pure HO<sub>2</sub> source, the Hg lamp was switched on and CO was introduced immediately behind the H<sub>2</sub>O photolysis zone, with NO at the inlet of Nafion reactor. Under these conditions, both H atoms and OH from H<sub>2</sub>O photolysis were promptly converted to HO<sub>2</sub>, then titrated by NO to form NO<sub>2</sub>. The resulting NO<sub>2</sub> signal is denoted as S<sub>1</sub> (amplification mode). In the background mode, the lamp remained on while CO was substituted by N<sub>2</sub>. The corresponding NO<sub>2</sub> signal, S<sub>2</sub>, represents the background mode when HO<sub>2</sub> is only produced by H+O<sub>2</sub> pathway. With the lamp off, signal S<sub>3</sub> and

$S_4$  correspond to the amplification and background signals in the absence of radicals, respectively. Thus,  $(S_2 - S_4)$  represents the  $HO_2$  only produced by  $H+O_2$  pathway, whereas  $(S_1 - S_3)$  corresponds to the chain-amplified  $NO_2$  signal from  $HO_2$  produced via both the  $H + O_2$  and  $OH + CO$  pathways. The CL is then obtained from these four signals using Eq. (2).

$$CL = \frac{\Delta NO_2}{[HO_2]} = \frac{S_1 - S_3}{2(S_2 - S_4)} \quad (Eq. 2)$$

”

Section 3.1:

“

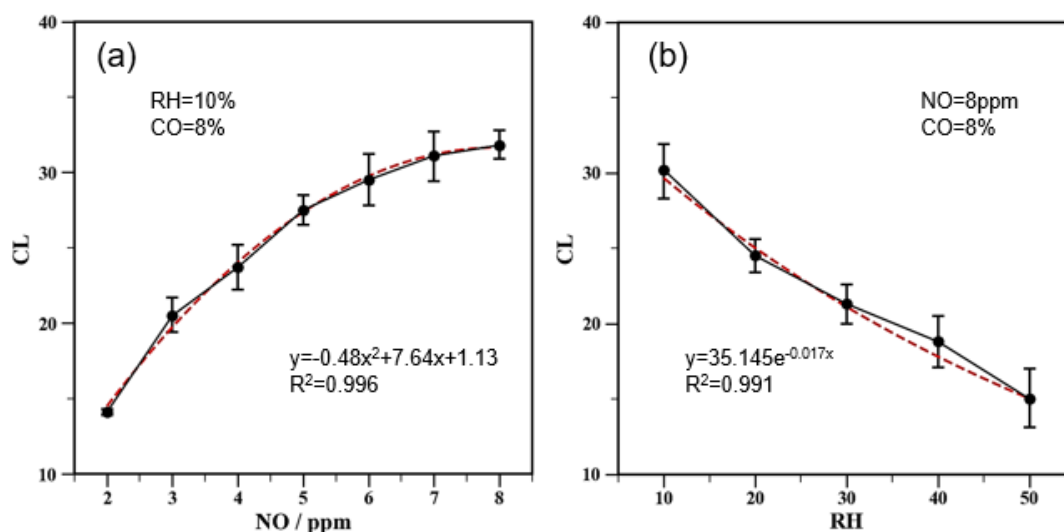

Figure 2. (a) Relationship between the CL and NO concentration under conditions of 10% RH and 8% CO concentration. (b) Variation of CL with RH at a fixed NO concentration of 8 ppm and CO concentration of 8%. (Error bars represent the standard deviation of five independent measurements.)

”

“The optimal CL for the PERCA-CEAS measurement system was determined to be  $30 \pm 2$  under the conditions of  $RH = 10\%$ ,  $NO = 8$  ppm, and  $CO = 8\%$  based on the pure  $HO_2$  calibration.”

Comment [2-3]: **Representativeness of CL for  $RO_2$  species.** CL for  $RO_2$  is generally lower than for  $HO_2$ , and this difference depends strongly on system-specific factors such as wall losses and reactor design. Therefore, adopting uncertainties from other instruments (Kartal et al., 2010) may not be appropriate without justification. The authors should consider calibration with at least one  $RO_2$  species or clearly state this as a limitation.

Response [2-3]: Thank you for the comment. We performed a dedicated calibration using methyl peroxy radicals ( $CH_3O_2$ ) in addition to the standard  $HO_2$  source. Specifically, a mixed  $HO_2$ – $CH_3O_2$  calibration source was generated by replacing CO with  $CH_4$  (150 ppm in  $N_2$ ) immediately downstream of the  $H_2O$  photolysis zone. In this configuration, OH radicals react with  $CH_4$  to form  $CH_3O_2$  via  $OH + CH_4 + O_2 + M \rightarrow CH_3O_2 + H_2O + M$ , while H atoms are efficiently converted to  $HO_2$ . The setup is

expected to yield a mixture of 50% HO<sub>2</sub> and 50% CH<sub>3</sub>O<sub>2</sub>. Our results show that the CL derived from this mixed source differs from that obtained using the pure HO<sub>2</sub> source by 20%, with a measured CL of 24.

These details have been added in Sections 2.2 and 3.1, and the resulting uncertainty has been incorporated into the overall uncertainty budget (Section 3.2).

Sections 2.2:

“...RO<sub>2</sub> radical. When CH<sub>4</sub> (150 ppm in N<sub>2</sub>) is used instead of CO, OH reacts with CH<sub>4</sub> to form CH<sub>3</sub>O<sub>2</sub> (R7), yielding a mixed peroxy radical source containing approximately 50 % HO<sub>2</sub> and 50 % CH<sub>3</sub>O<sub>2</sub> under typical calibration conditions.”

“...using Eq. (2). The mixed HO<sub>2</sub>–CH<sub>3</sub>O<sub>2</sub> standard was generated by introducing CH<sub>4</sub> only during the S<sub>1</sub> (amplification) measurement and was used to verify the instrument response to organic peroxy radicals relative to HO<sub>2</sub> under otherwise identical conditions.”

Sections 3.1:

“...HO<sub>2</sub> calibration. Calibration using a mixed radical source consisting of 50% HO<sub>2</sub> and 50% CH<sub>3</sub>O<sub>2</sub> yielded a CL of 24±1 under the same conditions.”

Sections 3.2:

“(3) Uncertainty in radical partitioning. This arises from variability in the relative contributions of HO<sub>2</sub> and CH<sub>3</sub>O<sub>2</sub> to total peroxy radicals. Based on the reported HO<sub>2</sub>/RO<sub>2</sub> (0.8–1.2) and CH<sub>3</sub>O<sub>2</sub>/RO<sub>2</sub> (0.85–0.95) ratios from Stone et al., (2010), the mole fraction of CH<sub>3</sub>O<sub>2</sub> in total peroxy radicals (f) is estimated to be 0.41–0.54. Under these conditions, the use of an HO<sub>2</sub>-based calibration would introduce a systematic bias of 16–22% in the derived RO<sub>2</sub>\* concentration.”

Comment [2-4]: **Instrument description.** *As this is the first publication of the PWRCAs system used, additional details such as flow rate, residence time, reactor pressure, detector flow conditions, etc should be included for reproducibility.*

Response [2-4]: Thanks for the suggestions. We have clarified additional details of technical specifications in Section 2.1, such as reagent gas purities, flow rates, mixing ratios, reactor dimensions, and residence times. The revised text is as follows:

“The NO and CO gases were injected into the system accompanied by N<sub>2</sub> as a balancing gas. To ensure gas purity, the NO (100 ppmv in N<sub>2</sub>) was passed through a ferrous sulfate heptahydrate (FeSO<sub>4</sub>·7H<sub>2</sub>O) filter to remove trace NO<sub>2</sub> impurities. The flow rate of this NO mixture was regulated at 120 mL/min, achieving a final concentration of 8 ppmv in the reactor. Similarly, high-purity CO gas (99.99%) was passed through an activated carbon column to eliminate residual carbonyl compounds before entering the reactor at 120 mL/min, corresponding to a constant concentration of 8% (v/v) during amplification mode. The total system flow was maintained at 1500 mL/min using mass flow controllers, corresponding to a residence time of approximately 3 s in the reaction zone.”

Comment [2-5]: **Valve configuration.** *There is inconsistency between the text and schematic regarding valve configuration.*

- Line 156 refers to one three-way solenoid valve,

- Figure 1 shows four two-way valves
- Line 160 also mentions four solenoid valves.

This should be clarified.

Response [2-5]: Thanks for the careful check of the valve configuration. We apologize for the inconsistency in the description of the valve configuration. The system actually uses four two-way solenoid valves instead of three-way valves. The text has now been revised to ensure consistency with Figure 1. We have updated the description in Section 2.1 to explicitly state this configuration.

“To enable automated switching between amplification and background modes in the single-channel configuration, an automatic valve-switching module driven by a programmable timer was developed. The flow paths of CO and N<sub>2</sub> were controlled using four two-way solenoid valves, with two valves assigned to each gas line. During the amplification mode, the timer directs CO to the front inlet to initiate the chain reaction with NO, while N<sub>2</sub> is routed to the rear inlet. Conversely, in the background mode, the valve states are toggled so that N<sub>2</sub> is introduced at the front and CO is directed to the rear. By synchronizing the switching of these four valves, the system achieves stable and automated mode transitions for real-time detection of peroxy radicals.”

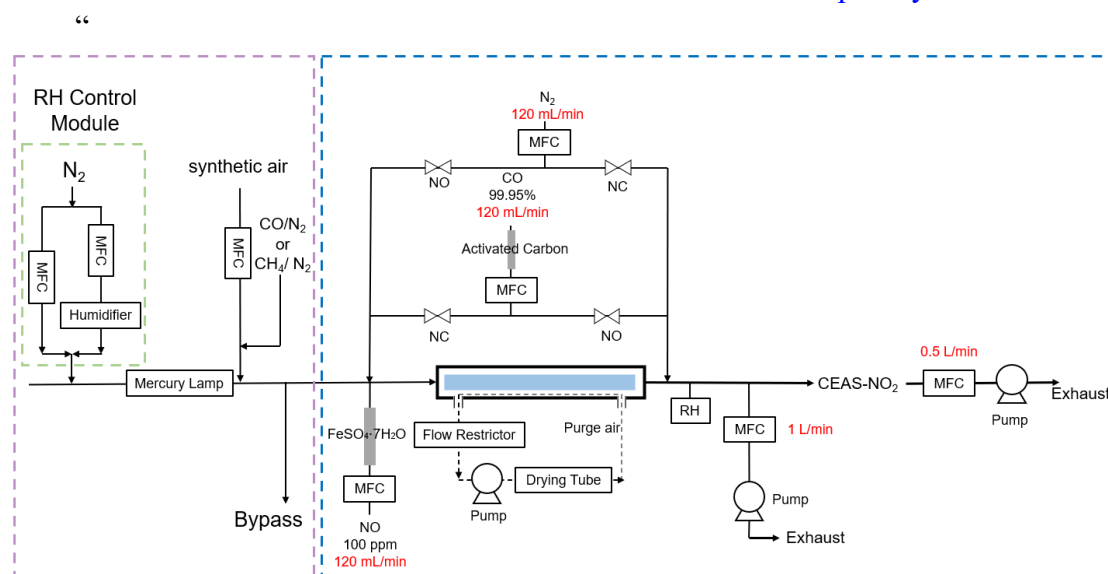

Figure 1. Schematic diagram of the PERCA-CEAS system. The purple dash line portion represents the standard source module, which consists of the standard gas generation unit and the relative humidity (RH) control unit (outlined in green) and is used for calibrating the system chain length. The blue dash line portion represents the measurement module, comprising the chemical amplification unit and the NO<sub>2</sub> detection unit, which together enable the quantification of atmospheric peroxy radicals.

Comment [2-6]: HO<sub>2</sub> source in the schematic diagram. The schematic suggests N<sub>2</sub> is humidified prior to photolysis, but HO<sub>2</sub> formation requires O<sub>2</sub>. The authors should clarify how O<sub>2</sub> or synthetic air is introduced and whether it is always present. The

publication will benefit from including additional details about the source (e.g. Flow rates)

Response [2-6]: Thanks for the suggestions. To ensure rapid conversion of both H atoms and OH radicals to HO<sub>2</sub>, a mixture of synthetic air and reagent gases (CO/N<sub>2</sub> or CH<sub>4</sub>/N<sub>2</sub>) is injected immediately downstream of the photolysis zone within the calibration module. This ensures that O<sub>2</sub> is always present to promote radical conversion and minimize potential wall losses. In addition, the relative humidity (RH) of the radical standard source was maintained at approximately 10% by adjusting the mixing ratio of dry and humidified N<sub>2</sub> streams, while providing a stable radical output of ~1–3 ppbv.

We have updated Section 2.2 and Figure 1 in the revised manuscript to reflect these modifications.

“...water vapor photolysis. A pen-type Hg lamp was used to photolyze H<sub>2</sub>O in an N<sub>2</sub> carrier gas (mixture of dry and humidified N<sub>2</sub>), producing H atoms and OH radicals (R5). Immediately downstream of the lamp, a mixture of synthetic air and reagent gases (CO/N<sub>2</sub> or CH<sub>4</sub>/N<sub>2</sub>) was introduced to reduce radical wall losses and allow rapid mixing with the photolysis products.”

“...calibration conditions. In all cases, the relative humidity in the calibration flow was adjusted to ~10 %, yielding a stable peroxy radical concentration of ~1–3 ppbv.”

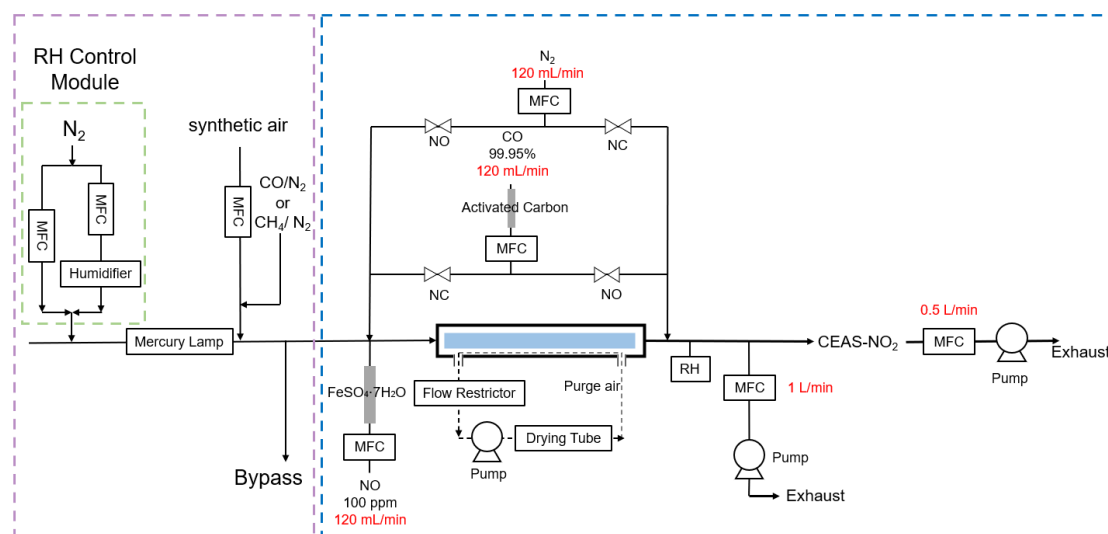

Figure 1. Schematic diagram of the PERCA-CEAS system. The purple dash line portion represents the standard source module, which consists of the standard gas generation unit and the relative humidity (RH) control unit (outlined in green) and is used for calibrating the system chain length. The blue dash line portion represents the measurement module, comprising the chemical amplification unit and the NO<sub>2</sub> detection unit, which together enable the quantification of atmospheric peroxy radicals.

Comment [2-7]: **PERCA interferences.** A discussion of PAN thermal decomposition and related interferences would improve the scientific completeness.

Response [2-7]: Thanks for the suggestion. The potential interference from PAN thermal decomposition was evaluated using a F0AM model (Framework for 0-D

Modeling) under the experimental conditions (26.5 °C and 3 s residence time). The simulations indicate that the chemical amplification process is highly time-limited, reaching near completion within approximately 0.15 s. Within this short reaction window, only a fraction of PAN-derived radicals can effectively participate in the chain propagation before being removed by wall losses or exiting the reaction zone. Importantly, any NO<sub>2</sub> produced from slower PAN thermal decomposition outside the effective reaction window is also present in both amplification and background modes and is therefore removed through the differential measurement approach. Under a representative PAN level of 1.0 ppbv, the interference generated within the effective reaction window corresponds to an equivalent RO<sub>2</sub>\* signal of ~1.95 pptv. This accounts for approximately 1.3–9.8% of the typical RO<sub>2</sub>\* concentrations (20–150 pptv) observed during the campaign and has been incorporated into the overall measurement uncertainty.

We have added a detailed discussion regarding the potential interference from PAN thermal decomposition in Section 3.2 of the revised manuscript.

“(4) PAN interference. The thermal decomposition of PAN represents a potential source of interference, as it releases NO<sub>2</sub> and peroxy radicals that can trigger additional chemical amplification within the reactor (Liu and Zhang, 2014; Wood and Charest, 2014). Kinetic simulations using the F0AM model (Framework for 0-D Modeling; Wolfe et al., 2016) indicate that 1.0 ppbv PAN results in an equivalent RO<sub>2</sub>\* signal of 1.95 pptv under our experimental conditions (26.5 °C and a amplification reaction time of 0.15 s). This accounts for 1.3–9.8% of the typical RO<sub>2</sub>\* levels (20–150 pptv) observed during the campaign.”

Comment [2-8]: *Interpretation of chain length comparisons. CL comparisons should consider reactor material, reactor design, working pressure, humidity, and wall losses. Instruments such as Horstjann et al., (2014) include pre-reactor chambers that increase wall losses. The comment about influence of detection technique on CL should be reconsidered.*

Response [2-8]: Thanks for the suggestion. To address this, we have revised Section 3.1 and added Table 1 to provide a detailed summary of calibration conditions and technical specifications for previous PERCA systems.

“As summarized in Table 1, the obtained CL is lower than values reported in most previous PERCA studies, which were typically above 50 and occasionally exceeded 200 (George et al., 2020; Wood and Charest, 2014). The differences in CL are primarily attributed to wall loss of HO<sub>2</sub> radicals due to reactor material, reactor design and working pressure. Although the obtained CL is relatively low compared with these PERCA instruments, our results demonstrate that the developed PERCA-CEAS system provides stable and reliable sensitivity for atmospheric RO<sub>2</sub>\* measurements.

Table 1. Summary of performance for reported PERCA measurement systems

| Measurement System | Channel Configuration | Calibration Source | CL | LOD | Uncertainty | Pressure (mbar) | Reference |
|--------------------|-----------------------|--------------------|----|-----|-------------|-----------------|-----------|
|--------------------|-----------------------|--------------------|----|-----|-------------|-----------------|-----------|

|               |        |                                                                          |                |                       |            |            |                          |
|---------------|--------|--------------------------------------------------------------------------|----------------|-----------------------|------------|------------|--------------------------|
| PERCA-luminol | Single | CH <sub>3</sub> O <sub>2</sub>                                           | 200-260        | 2 pptv                | 40%        | 400 ~ 1000 | (Green et al., 2003)     |
| PERCA-luminol | Dual   | HO <sub>2</sub><br>50%HO <sub>2</sub> +50%CH <sub>3</sub> O <sub>2</sub> | 45±7           | 3±2 pptv<br>(3σ)      | /          | 200        | (Kartal et al., 2010)    |
| PERCA-luminol | Dual   | HO <sub>2</sub><br>50%HO <sub>2</sub> +50%CH <sub>3</sub> O <sub>2</sub> | 88±17<br>64±18 | 3 pptv<br>(1σ)        | /          | 300        | (Horstjann et al., 2014) |
| PERCA-CRDS    | Dual   | HO <sub>2</sub>                                                          | 150±50         | 10 pptv<br>(3σ)       | /          | 1000       | (Liu et al., 2009)       |
| PERCA-CRDS    | Dual   | HO <sub>2</sub><br>CH <sub>3</sub> O <sub>2</sub>                        | 200<br>180     | 4 pptv<br>(3σ)        | /          | 1000       | (Liu and Zhang, 2014)    |
| PERCA-CRDS    | Dual   | HO <sub>2</sub><br>50%HO <sub>2</sub> +50%CH <sub>3</sub> O <sub>2</sub> | 62 ± 9         | < 2 pptv              | 15%        | 200 ~ 350  | (George et al., 2020)    |
| PERCA-CRDS    | Dual   | HO <sub>2</sub><br>RO <sub>2</sub> *                                     | 55             | 0.9 pptv<br>(3σ)      | /          | 1000       | (Duncianu et al., 2020)  |
| PERCA-CAPS    | Dual   | CH <sub>3</sub> C(O)O <sub>2</sub><br>CH <sub>3</sub> O <sub>2</sub>     | 168±20         | 0.6 pptv<br>(1σ, 60s) | 25%        | 1000       | (Wood and Charest, 2014) |
| ECHAMP-CAPS   | Dual   | CH <sub>3</sub> C(O)O <sub>2</sub><br>CH <sub>3</sub> O <sub>2</sub>     | 17             | 2.5 pptv<br>(1σ, 90s) | 27%        | 1000       | (Wood et al., 2017)      |
| PERCA-IBBCEAS | Dual   | HO <sub>2</sub>                                                          | 91 ± 11        | 0.9 pptv<br>(1σ)      | 16-20%     | 1000       | (Chen et al., 2016)      |
| PERCA-CEAS    | Single | HO <sub>2</sub><br>50%HO <sub>2</sub> +50%CH <sub>3</sub> O <sub>2</sub> | 30±2<br>24±1   | 0.38 pptv<br>(1σ)     | 18.4-25.7% | 1000       | This work                |

”

Comment [2-9]: ***Simplifications in ozone production analysis.*** The assumption  $k_{eff} = k(HO_2+NO)$  and simplified  $D(O_3)$  estimates should be discussed as sources of uncertainty.

Response [2-9]: Thanks for the suggestion. Considering the uncertainties associated with RO<sub>2</sub>\* measurements (18.4-25.7%), the  $k_{eff}$  approximation (~10%) and the upper limit of  $D(O_3)$  level (5%), the overall uncertainty in  $P(O_3)_{net}$  is estimated to be 21.5-28.0% according to error propagation calculation. These uncertainty analyses have been added to the revised text in Section 3.4.

“Considering uncertainties associated with RO<sub>2</sub>\* measurements (18.4-25.7%), the approximation of  $k_{eff}$  (~10%), and the upper limit of  $D(O_3)$  level (5%), the overall uncertainty in  $P(O_3)_{net}$  was estimated to be 21.5-28.0%.”

Comment [2-10]: **Interpretation of VOC influence.** *The attribution to VOC reactivity in Line 326 requires supporting evidence or should be presented more cautiously.*

Response [2-10]: Thanks for the suggestion. Although in-situ VOC measurements were not conducted, regional studies suggest relatively high VOC reactivity in the study area. Studies at nearby coastal sites (e.g., Da Wan Shan Island) have reported high oxidative capacity in air masses over the Pearl River Estuary, associated with strong VOC consumption and enhanced radical cycling (Sun et al., 2024). In addition, the subtropical climate and dense vegetation in the Pearl River Delta contribute substantial biogenic emissions (e.g., isoprene), which may enhance the regional radical budget (Situ et al., 2013; Wang et al., 2023c). At our site, these elevated VOC levels are likely to sustain RO<sub>2</sub> formation and reduce sensitivity to NO titration, thereby shifting the RO<sub>2</sub>\*- NO transition toward higher NO levels. We have strengthened the discussion by adding supporting literature on VOC reactivity in Section 3.3 of the revised manuscript.

“This behavior is consistent with the elevated VOC reactivity inferred for studies conducted near our observation site. Studies at nearby coastal sites (e.g., Da Wan Shan Island) have reported high oxidative capacity associated with strong VOC consumption and enhanced radical cycling (Sun et al., 2024), while the dense vegetation in the Pearl River Delta contributes substantial biogenic VOC emissions (e.g., isoprene) (Situ et al., 2013; Wang et al., 2023c). Collectively, these factors contribute to sustaining propagation cycles of RO<sub>2</sub> radical and shift the turning point of the NO dependence of RO<sub>2</sub>\* concentration higher at our site.”

Comment [2-11]: **Interpretation nighttime RO<sub>2</sub>\*.** *If the nighttime RO<sub>2</sub>\* is attributed to NO<sub>3</sub> driven chemistry, more detailed scientific explanation is necessary since NO<sub>3</sub> measurement are not given.*

Response [2-11]: Thanks for the suggestion. To provide further clarification, the nitrate radical production rate, P(NO<sub>3</sub>), was calculated as follows:

$$P(NO_3) = k[NO_2][O_3]$$

where  $k_{NO_2+O_3}$  represents the temperature-dependent rate constant for the reaction between NO<sub>2</sub> and O<sub>3</sub> (Atkinson et al., 2004). During the campaign, the average nighttime (18:00–06:00) P(NO<sub>3</sub>) was approximately 1.4 ppbv·h<sup>-1</sup>, higher than the reported warm-season mean of 1.07 ± 0.38 ppbv·h<sup>-1</sup> over China (Wang et al., 2023a), indicating active nighttime NO<sub>3</sub> chemistry at this site. This substantial production rate suggests the presence of an efficient nighttime oxidation pathway and helps explain the observed RO<sub>2</sub>\* levels. We have added this quantitative analysis and a more detailed discussion of NO<sub>3</sub> chemistry to Section 3.3 of the revised manuscript.

“... at night (Figure 4a). The relatively high level of RO<sub>2</sub>\* at night indicates the presence of a nighttime peroxy radical source possibly due to NO<sub>3</sub> chemistry oxidation. We found that the average NO<sub>3</sub> production rate (P(NO<sub>3</sub>)) at night during the campaign was approximately 1.4 ppbv·h<sup>-1</sup>, higher than the reported warm-season mean of 1.07 ± 0.38 ppbv·h<sup>-1</sup> over China (Wang et al., 2023a), indicating active nighttime NO<sub>3</sub> chemistry at this site.”

### **Minor Comments**

*Line 76: wording correction.*

Thank you for the suggestion. The wording has been revised to “NO and CO are introduced to drive chain reactions that amplify peroxy radicals into detectable NO<sub>2</sub> signals.”

*Line 264: extra space.*

Corrected accordingly.

*Line 275: define abbreviations and use LOD.*

Corrected accordingly.

*Line 313: 'deceased' should be 'decreased'. O<sub>3</sub> range appears reversed.*

Corrected accordingly.

## Reference

- Atkinson, R., Baulch, D. L., Cox, R. A., Crowley, J. N., Hampson, R. F., Hynes, R. G., Jenkin, M. E., Rossi, M. J., and Troe, J.: Evaluated kinetic and photochemical data for atmospheric chemistry: volume I - gas phase reactions of Ox, HO<sub>x</sub>, NO<sub>x</sub> and SO<sub>x</sub> species, *Atmos. Chem. Phys.*, 4, 1461–1738, <https://doi.org/10.5194/acp-4-1461-2004>, 2004.
- Chen, Y., Yang, C., Zhao, W., Fang, B., Xu, X., Gai, Y., Lin, X., Chen, W., and Zhang, W.: Ultra-sensitive measurement of peroxy radicals by chemical amplification broadband cavity-enhanced spectroscopy, *Analyst*, 141, 5870–5878, <https://doi.org/10.1039/C6AN01038E>, 2016.
- Duncan, M., Lahib, A., Tomas, A., Stevens, P. S., and Dusanter, S.: Characterization of a chemical amplifier for peroxy radical measurements in the atmosphere, *Atmos. Environ.*, 222, 117106, <https://doi.org/10.1016/j.atmosenv.2019.117106>, 2020.
- George, M., Andrés Hernández, M. D., Nenakhov, V., Liu, Y., and Burrows, J. P.: Airborne measurement of peroxy radicals using chemical amplification coupled with cavity ring-down spectroscopy: the PerCEAS instrument, *Atmos. Meas. Tech.*, 13, 2577–2600, <https://doi.org/10.5194/amt-13-2577-2020>, 2020.
- Green, T. J., Reeves, C. E., Brough, N., Edwards, G. D., Monks, P. S., and Penkett, S. A.: Airborne measurements of peroxy radicals using the PERCA technique, *J. Environ. Monit.*, 5, 75–83, <https://doi.org/10.1039/b204493e>, 2003.
- Horstjann, M., Andrés Hernández, M. D., Nenakhov, V., Chrobry, A., and Burrows, J. P.: Peroxy radical detection for airborne atmospheric measurements using absorption spectroscopy of NO<sub>2</sub>, *Atmos. Meas. Tech.*, 7, 1245–1257, <https://doi.org/10.5194/amt-7-1245-2014>, 2014.
- Kartal, D., Andrés-Hernández, M. D., Reichert, L., Schlager, H., and Burrows, J. P.: Technical note: characterisation of a DUALER instrument for the airborne measurement of peroxy radicals during AMMA 2006, *Atmos. Chem. Phys.*, 10, 3047–3062, <https://doi.org/10.5194/acp-10-3047-2010>, 2010.

- Liu, Y. and Zhang, J.: Atmospheric peroxy radical measurements using dual-channel chemical amplification cavity ringdown spectroscopy, *Anal. Chem.*, 86, 5391–5398, <https://doi.org/10.1021/ac5004689>, 2014.
- Liu, Y., Morales-Cueto, R., Hargrove, J., Medina, D., and Zhang, J.: Measurements of peroxy radicals using chemical amplification-cavity ringdown spectroscopy, *Environ. Sci. Technol.*, 43, 7791–7796, <https://doi.org/10.1021/es901146t>, 2009.
- Situ, S., Guenther, A., Wang, X., Jiang, X., Turnipseed, A., Wu, Z., Bai, J., and Wang, X.: Impacts of seasonal and regional variability in biogenic VOC emissions on surface ozone in the pearl river delta region, china, *Atmos. Chem. Phys.*, 13, 11803–11817, <https://doi.org/10.5194/acp-13-11803-2013>, 2013.
- Stone, D., Evans, M. J., Commane, R., Ingham, T., Floquet, C. F. A., McQuaid, J. B., Brookes, D. M., Monks, P. S., Purvis, R., Hamilton, J. F., Hopkins, J., Lee, J., Lewis, A. C., Stewart, D., Murphy, J. G., Mills, G., Oram, D., Reeves, C. E., and Heard, D. E.: HO<sub>x</sub> observations over west Africa during AMMA: impact of isoprene and NO<sub>x</sub>, *Atmos. Chem. Phys.*, 10, 9415–9429, <https://doi.org/10.5194/acp-10-9415-2010>, 2010.
- Sun, J., Yu, X., Ling, Z., Fang, G., Ming, L., Zhao, J., Zou, S., Guan, H., Wang, H., Wang, X., Wang, Z., Gao, Y., Tham, Y. J., Guo, H., and Zhang, Y.: Roles of photochemical consumption of VOCs on regional background O<sub>3</sub> concentration and atmospheric reactivity over the pearl river estuary, southern China, *Sci. Total Environ.*, 928, 172321, <https://doi.org/10.1016/j.scitotenv.2024.172321>, 2024.
- Wang, H., Wang, H., Lu, X., Lu, K., Zhang, L., Tham, Y. J., Shi, Z., Aikin, K., Fan, S., Brown, S. S., and Zhang, Y.: Increased night-time oxidation over China despite widespread decrease across the globe, *Nat. Geosci.*, 16, 217–223, <https://doi.org/10.1038/s41561-022-01122-x>, 2023a.
- Wang, J., Zhang, Y., Xiao, S., Wu, Z., and Wang, X.: Ozone formation at a suburban site in the pearl river delta region, china: role of biogenic volatile organic compounds, *Atmosphere*, 14, 609–625, <https://doi.org/10.3390/atmos14040609>, 2023c.
- Wolfe, G. M., Marvin, M. R., Roberts, S. J., Travis, K. R., and Liao, J.: The framework for 0-D atmospheric modeling (F0AM) v3.1, *Geosci. Model Dev.*, 9, 3309–3319, <https://doi.org/10.5194/gmd-9-3309-2016>, 2016.
- Wood, E. C. and Charest, J. R.: Chemical amplification - cavity attenuated phase shift spectroscopy measurements of atmospheric peroxy radicals, *Anal. Chem.*, 86, 10266–10273, <https://doi.org/10.1021/ac502451m>, 2014.
- Wood, E. C., Deming, B. L., and Kundu, S.: Ethane-based chemical amplification measurement technique for atmospheric peroxy radicals, *Environ. Sci. Technol. Lett.*, 4, 15–19, <https://doi.org/10.1021/acs.estlett.6b00438>, 2017.
